# Supplementary material for: Development of a Polypropylene-Based Material with Flame-Retardant Properties for 3D Printing
Source: MDPI journal article supplement (doi:10.3390/polym16060858), 2024-03-21
Supplement: s1 [file s1]

## Supporting Information

# Development of a Polypropylene-Based Material with Flame-Retardant Properties for 3D Printing

Eleonora Lorenzi <sup>1</sup>, Rossella Arrigo <sup>1,2</sup> and Alberto Frache <sup>1,2,\*</sup>

<sup>1</sup> Department of Applied Science and Technology, Politecnico di Torino, Viale Teresa Michel 5, 15121 Alessandria, Italy; eleonora.lorenzi@polito.it (E.L.); rossella.arrigo@polito.it (R.A.)

<sup>2</sup> Local INSTM Unit, 15121 Alessandria, Italy

\* Correspondence: alberto.frache@polito.it

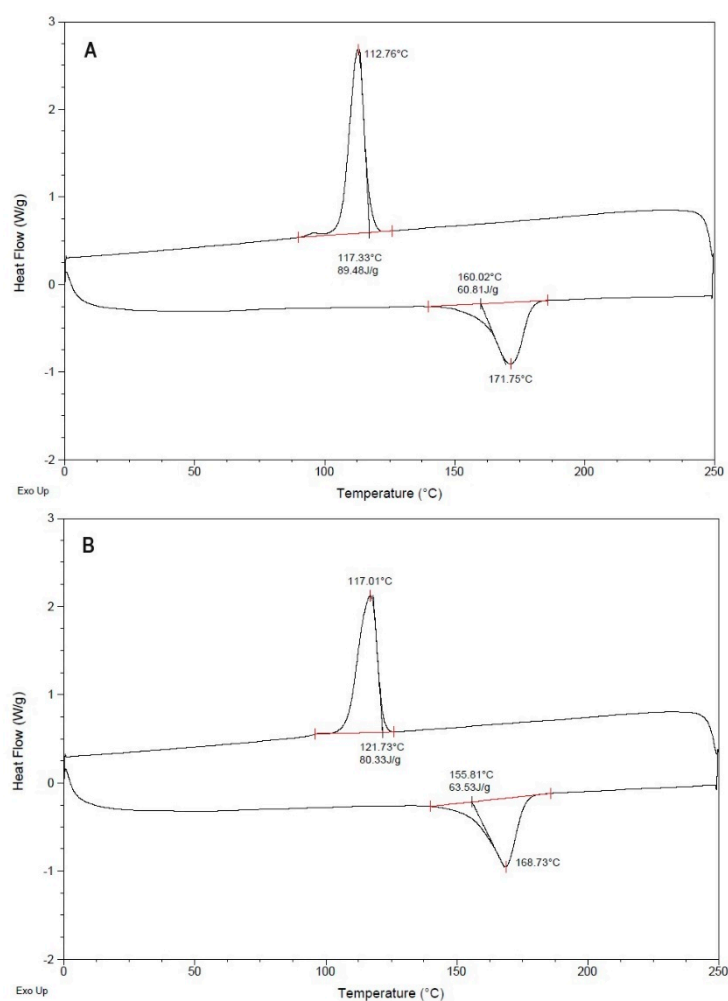

**Figure S1.** DSC traces of the 3D printed materials: (A) PP COPO and (B) PP COPO/C20A.

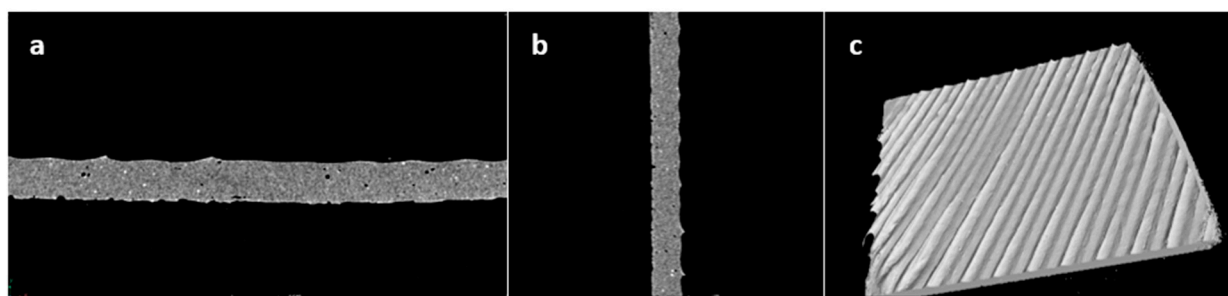

**Figure S2.** X-ray computed tomography images of (a,b) the section and (c) surface of a PP COPO/C20A 3D printed specimen.
